# Supplementary material
Source: HighWire-hosted journal article supplement (doi:10.1101/rna.072595.119)
Supplement: Supplemental_Figures_Tables.pdf [file Supplemental_Figures_Tables.pdf]

## Supplementary figure 1

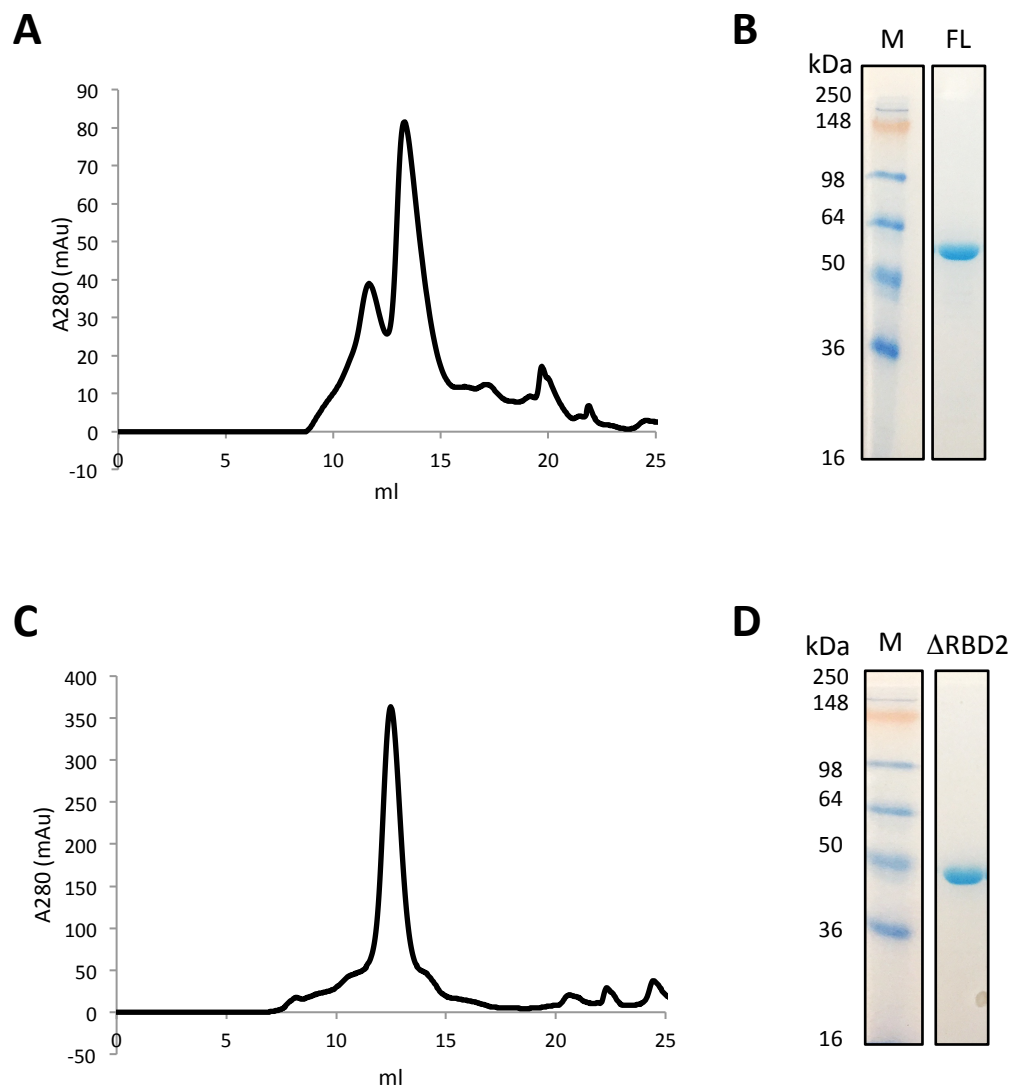

Figure S1: **Purification of hStau1<sup>55</sup>\_FL and hStau1<sup>55</sup>\_ΔRBD2.** A: Size exclusion chromatography of hStau1<sup>55</sup>\_FL in buffer A (25 mM HEPES pH 7.5, 100 mM KCl, 10 mM MgCl<sub>2</sub>, 200 mM L-Arg HCl) using a Superdex200 column at 0.5 ml/min flow-rate. B: SimplyBlue staining of 12% SDS-PAGE analysis of purified hStau1<sup>55</sup>\_FL. C: Size exclusion chromatography of hStau1<sup>55</sup>\_FL in buffer A (25 mM HEPES pH 7.5, 100 mM KCl, 10 mM MgCl<sub>2</sub>, 200 mM L-Arg HCl) using a Superdex200 column at 0.5 ml/min flow-rate. D: SimplyBlue staining of 12% SDS-PAGE analysis of purified hStau1<sup>55</sup>\_ΔRBD2.

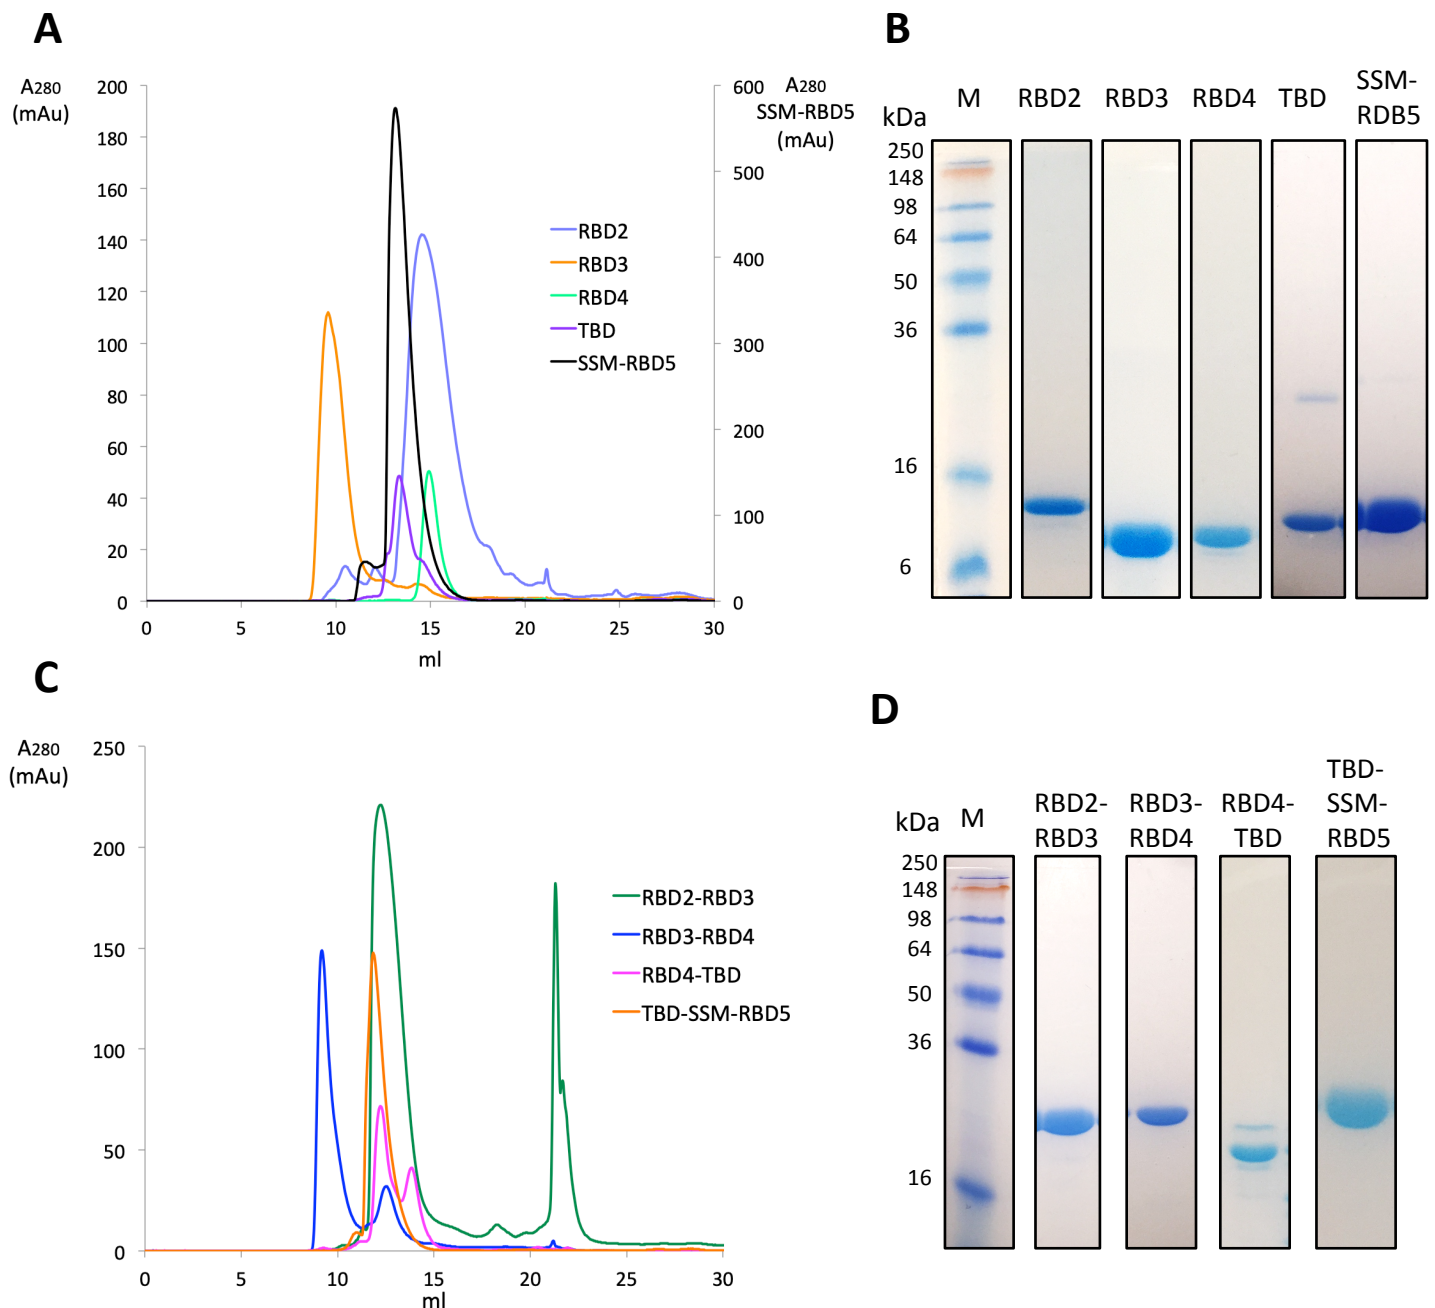

**Figure S2: Purification of Staufen constructs.** A: Size exclusion chromatography of Staufen individual domains in buffer A (25 mM HEPES pH 7.5, 100 mM KCl, 10 mM MgCl<sub>2</sub>, 200 mM L-Arg HCl) using a Superdex75 column at 0.7 ml/min flow-rate. B: SimplyBlue staining of 18% SDS-PAGE analysis of purified Staufen individual domains. C: Size exclusion chromatography of Staufen tandem domains in buffer A (25 mM HEPES pH 7.5, 100 mM KCl, 10 mM MgCl<sub>2</sub>, 200 mM L-Arg HCl) using a Superdex75 column at 0.7 ml/min flow-rate. B: SimplyBlue staining of 18% SDS-PAGE analysis of purified Staufen tandem domains.

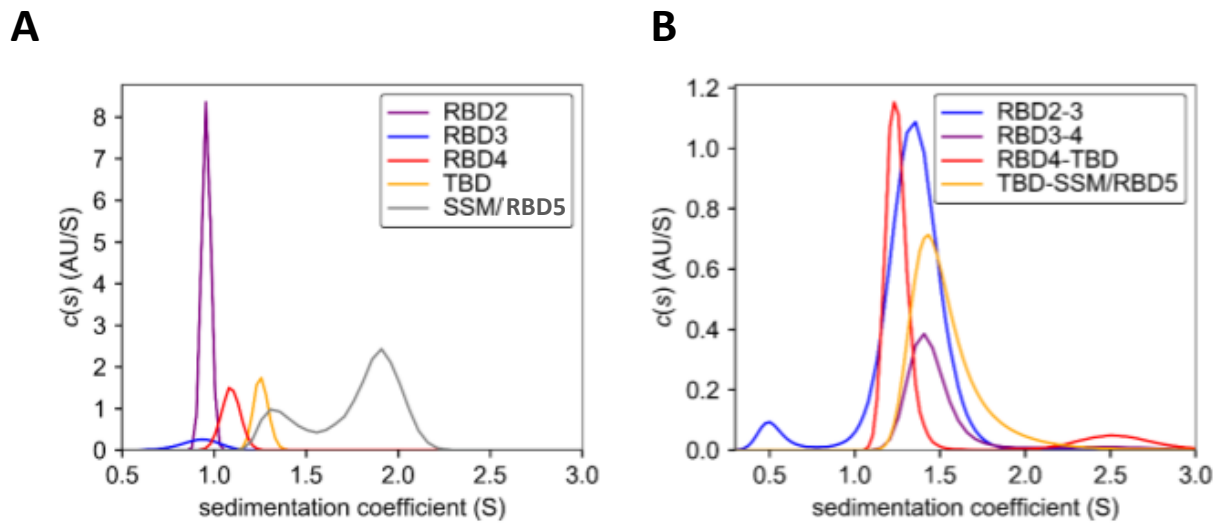

Figure S3: **Analytical ultracentrifugation (AUC) of Staufen constructs.** A: AUC of Staufen individual domains. B: AUC of Staufen tandem domains.

## Supplementary figure 4

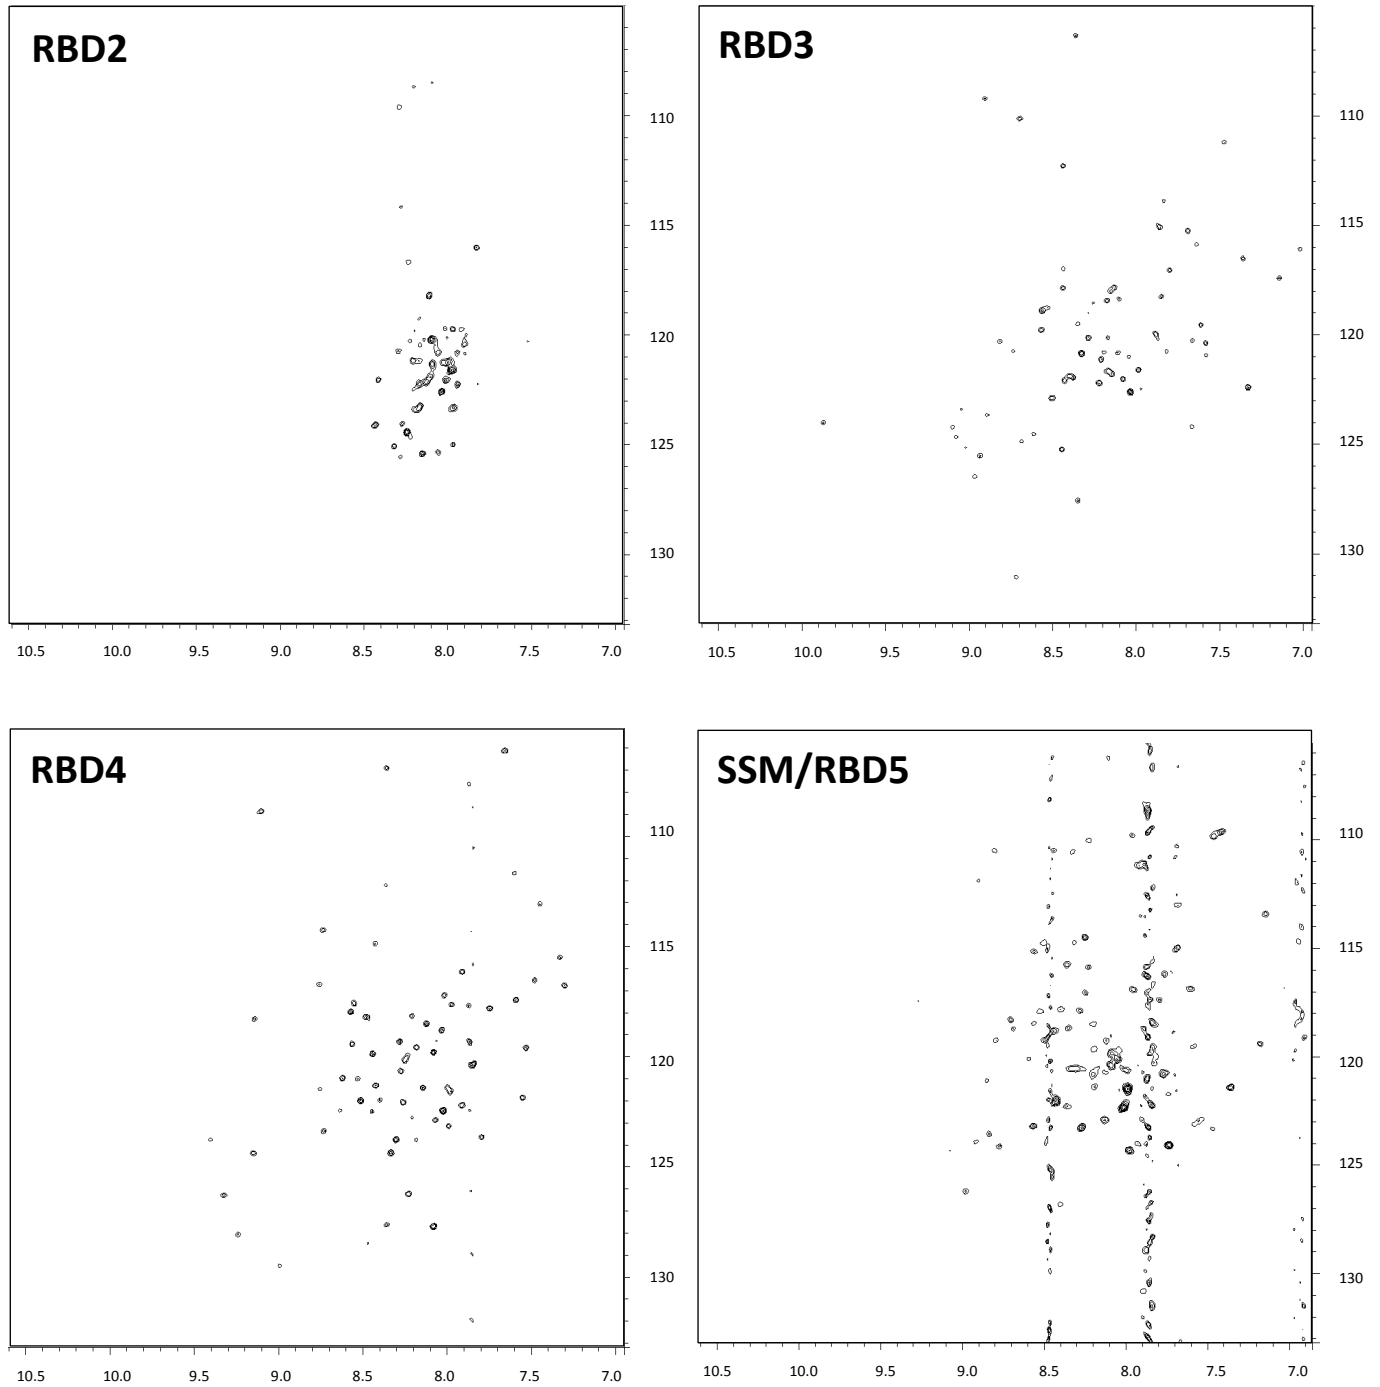

Figure S4: **NMR of Staufen individual domains.**  $^{15}\text{N}$ ,  $^1\text{H}$ -TROSY-HSQC spectra were acquired at 298 K using a Bruker AVANCE IIIHD 600 MHz spectrometer equipped with a 5 mm TCI cryoprobe .

## Supplementary figure 5

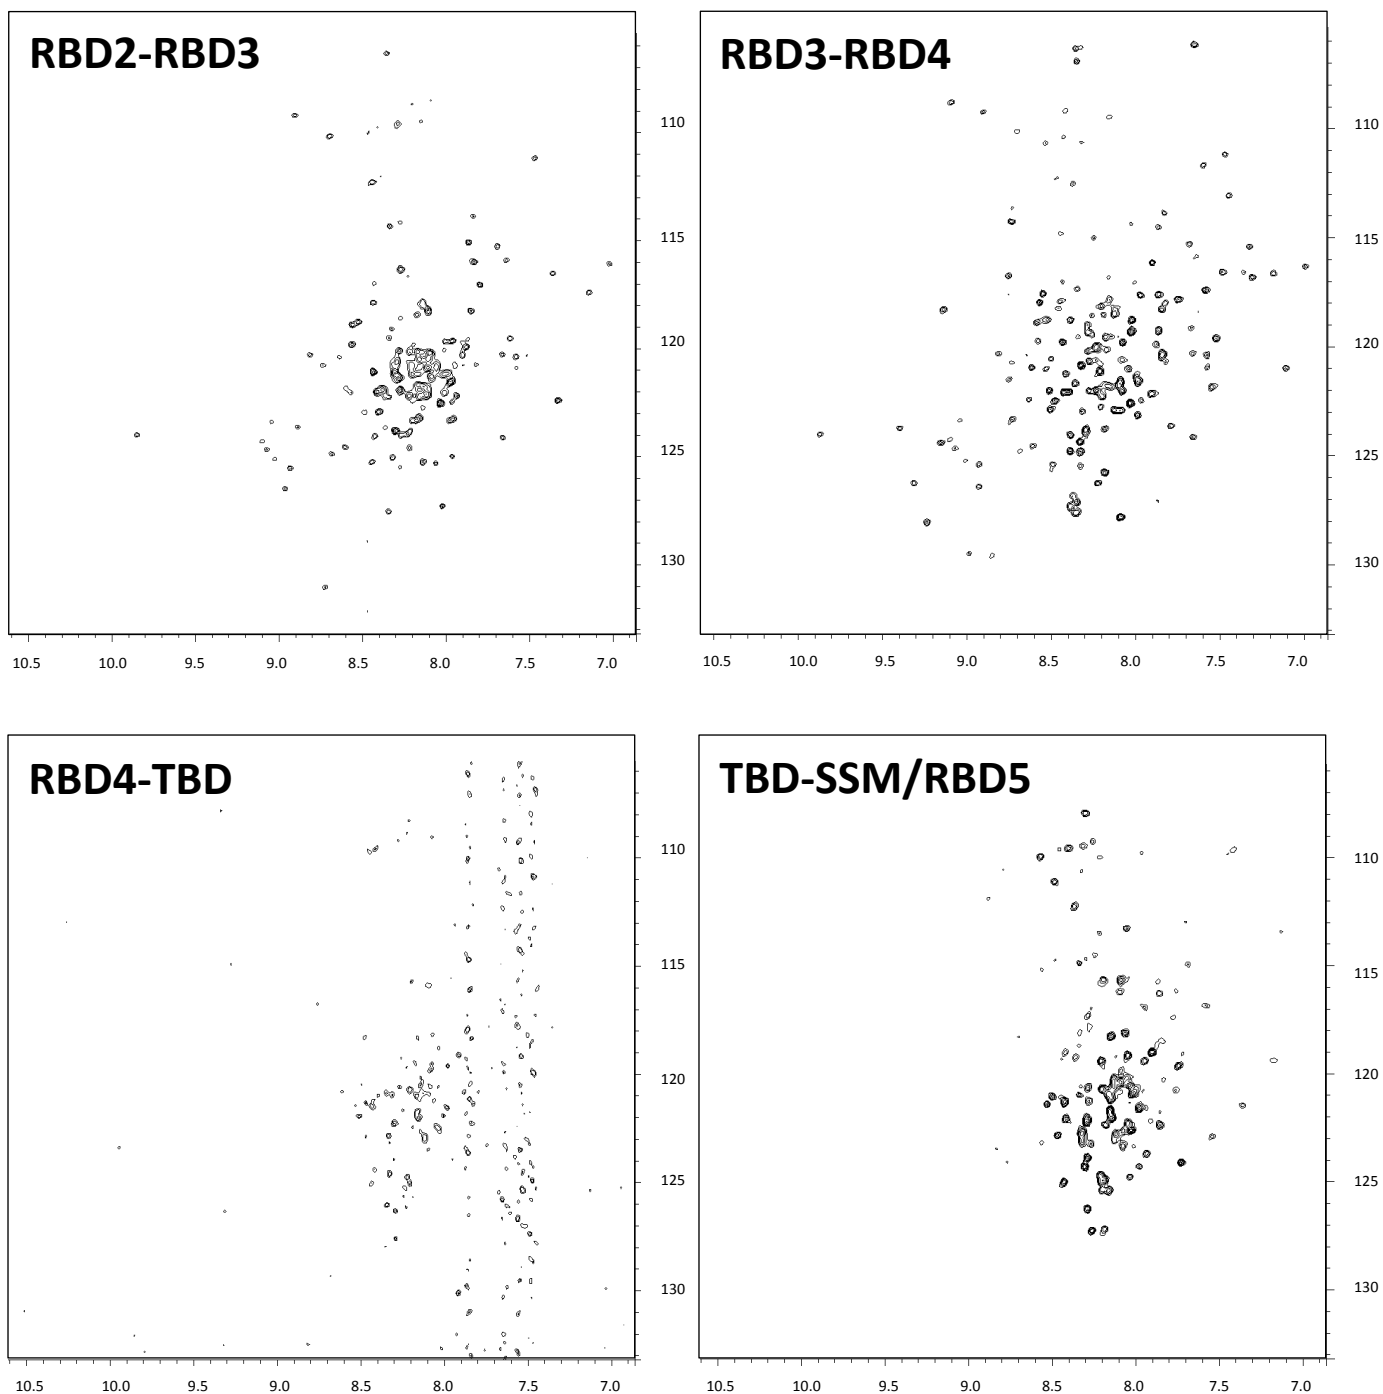

Figure S5: **NMR of Staufen tandem domains.**  $^{15}\text{N}$ ,  $^1\text{H}$ -TROSY-HSQC spectra were acquired at 298 K using a Bruker AVANCE IIIHD 600 MHz spectrometer equipped with a 5 mm TCI cryoprobe .

## Supplementary figure 6

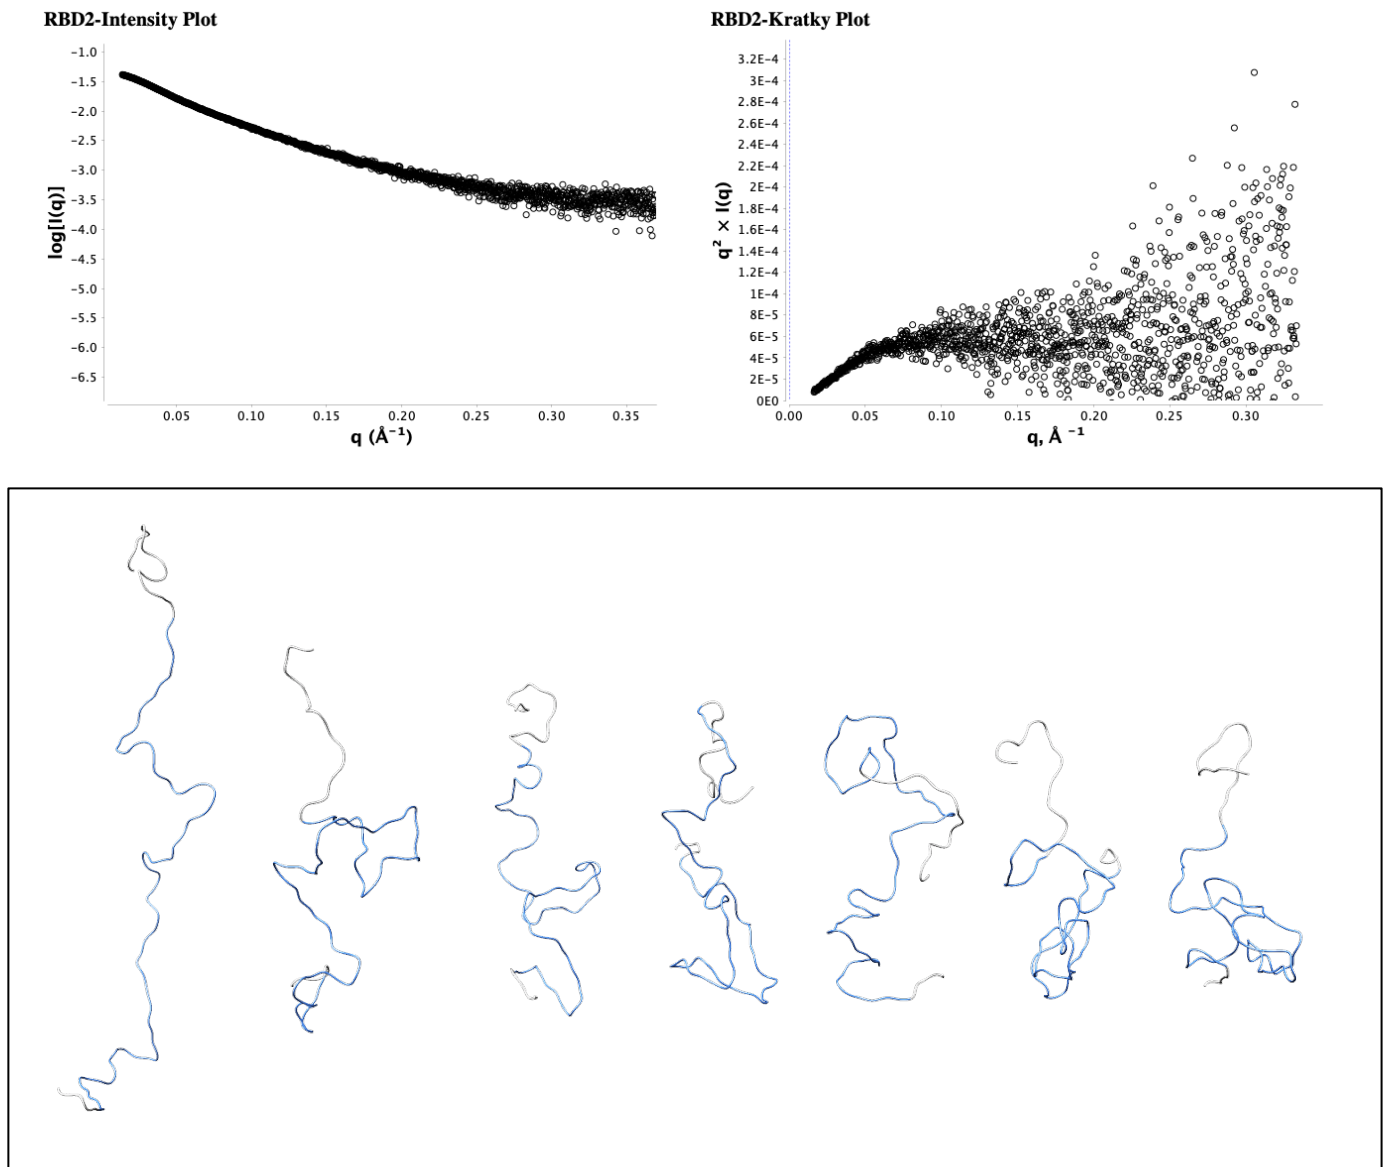

Figure S6: **Small angle X-ray scattering (SAXS) of RBD2.** A: SAXS curve, Kratky analysis and EOM models generated for RBD2.  $R_g$  *ensemble* = 37.3  $\text{\AA}$ ,  $D_{\max}$  *ensemble* = 112.64  $\text{\AA}$ ,  $X^2=0.98$ ,  $R_{\text{sigma}} = \sim 85.78\%$  ( $\sim 86.70\%$ ).

## Supplementary figure 7

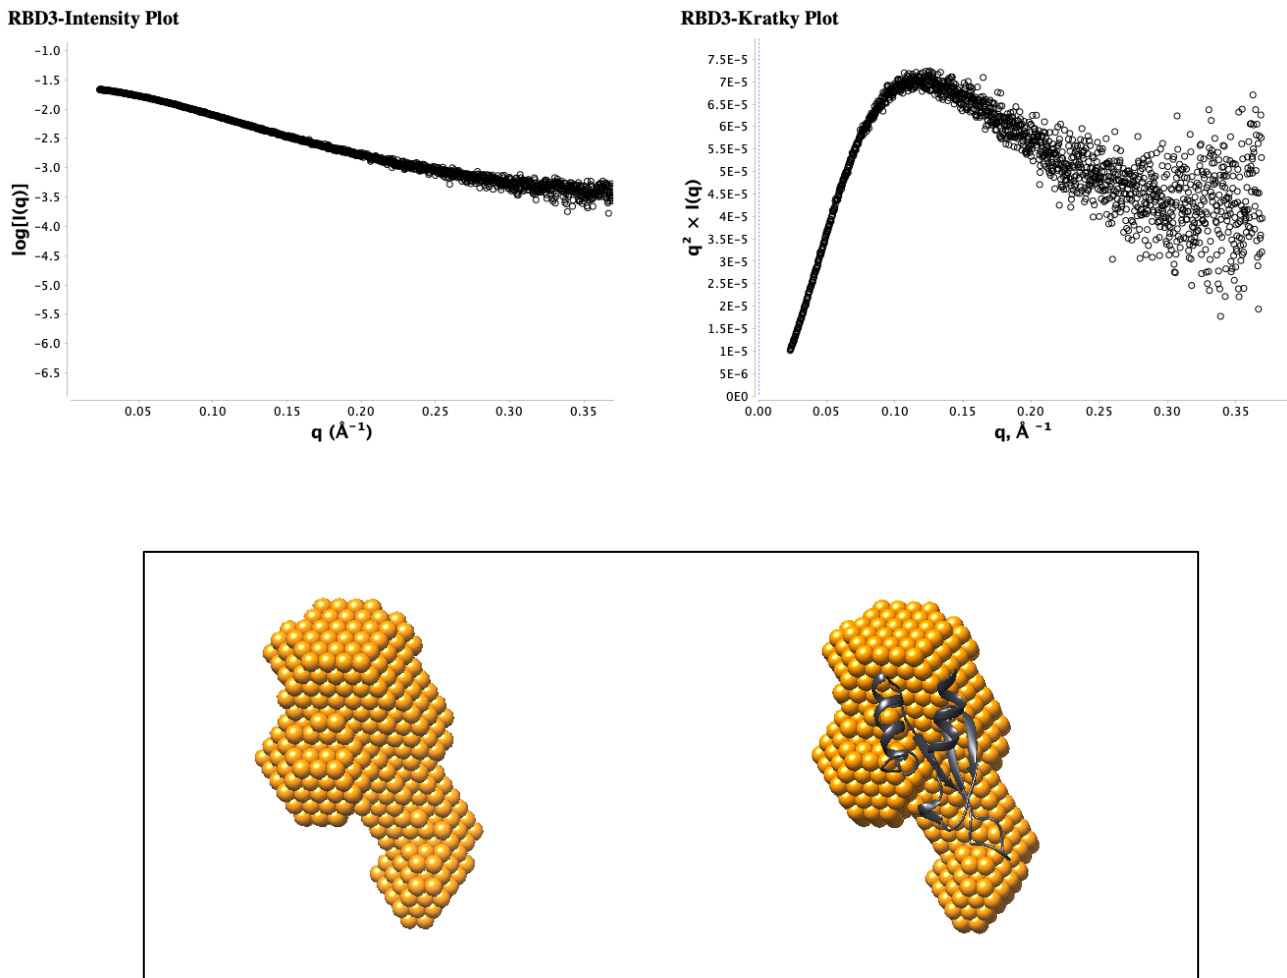

Figure S7. **Small angle X-ray scattering (SAXS) of RBD3.** A: SAXS curve, Kratky analysis and DAMMIN models generated for RBD3.  $R_g = 18.74 \text{\AA}$ ,  $D_{\max} = 58.08 \text{\AA}$ ,  $X^2 = 0.835$ .

## Supplementary figure 8

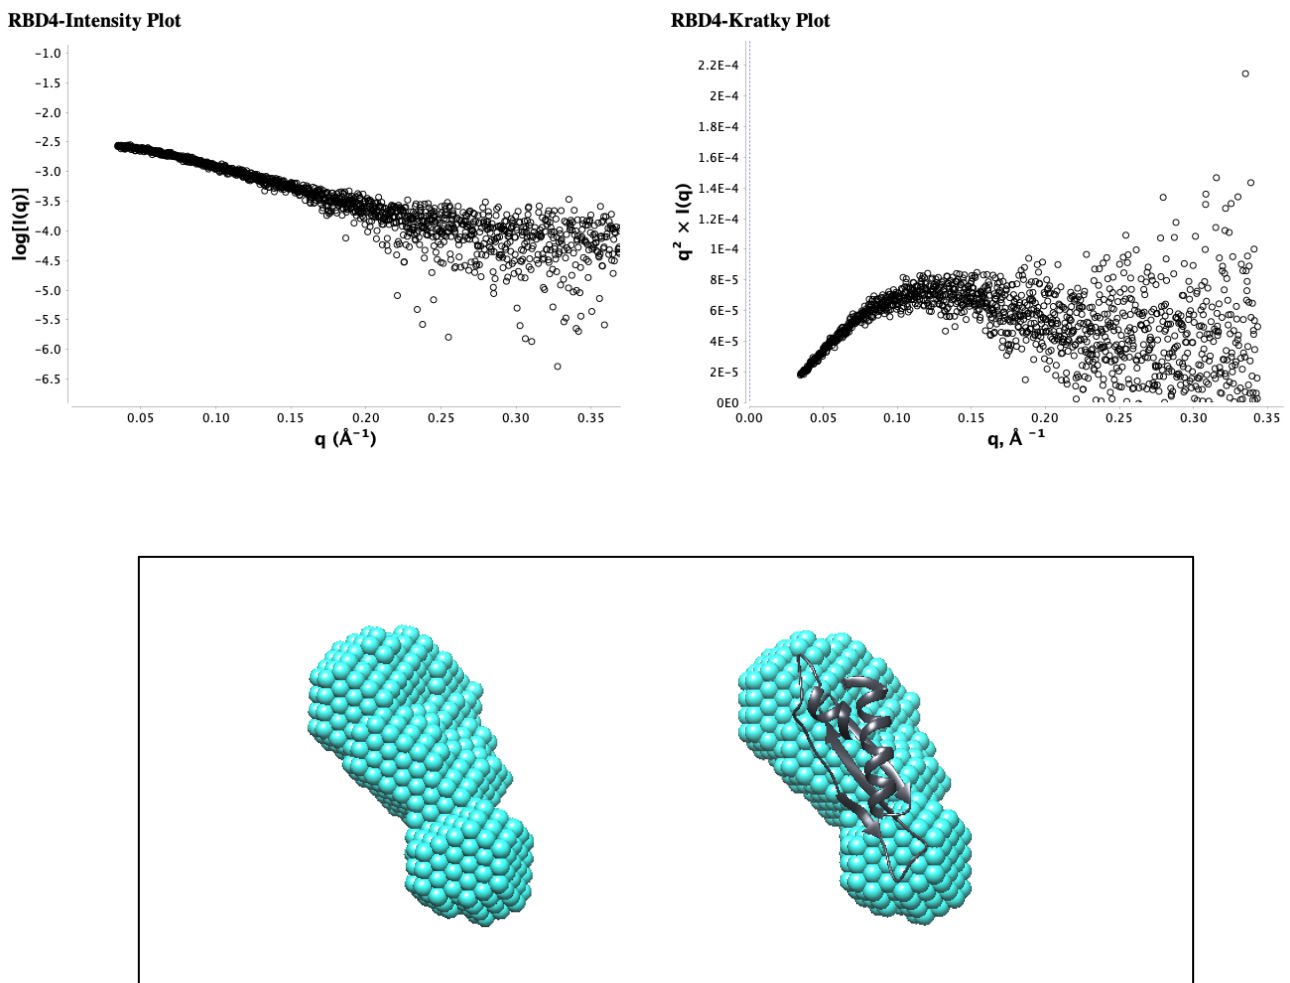

Figure S8. **Small angle X-ray scattering (SAXS) of RBD4.** A: SAXS curve, Kratky analysis and DAMMIN models generated for RBD4.  $R_g = 17.15 \text{ \AA}$ ,  $D_{\max} = 51.37 \text{ \AA}$ ,  $X^2 = 0.5314$ .

## Supplementary figure 9

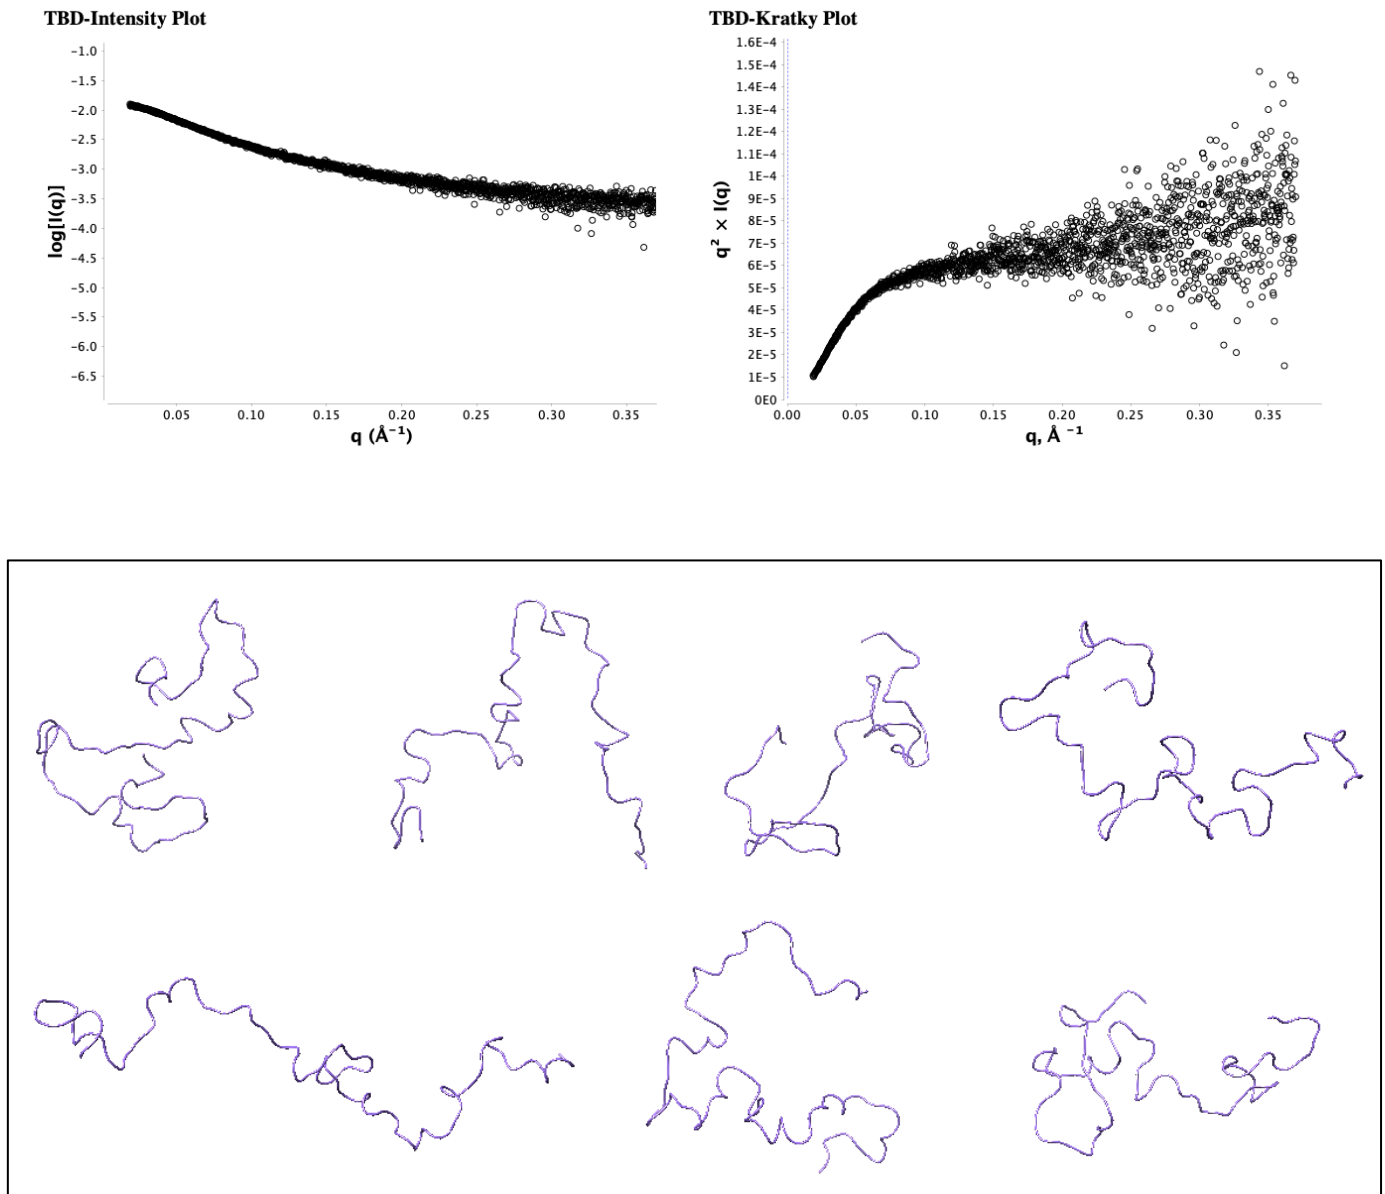

Figure S9. **Small angle X-ray scattering (SAXS) of TBD.** A: SAXS curve, Kratky analysis and EOM models generated for TBD.  $R_g$  ensemble = 31.74  $\text{\AA}$ ,  $D_{\max}$  ensemble = 97.24  $\text{\AA}$ ,  $X^2 = 1.29$ ,  $R_{\text{sigma}} = \sim 88.51\%$  ( $\sim 86.24\%$ ).

## Supplementary figure 10

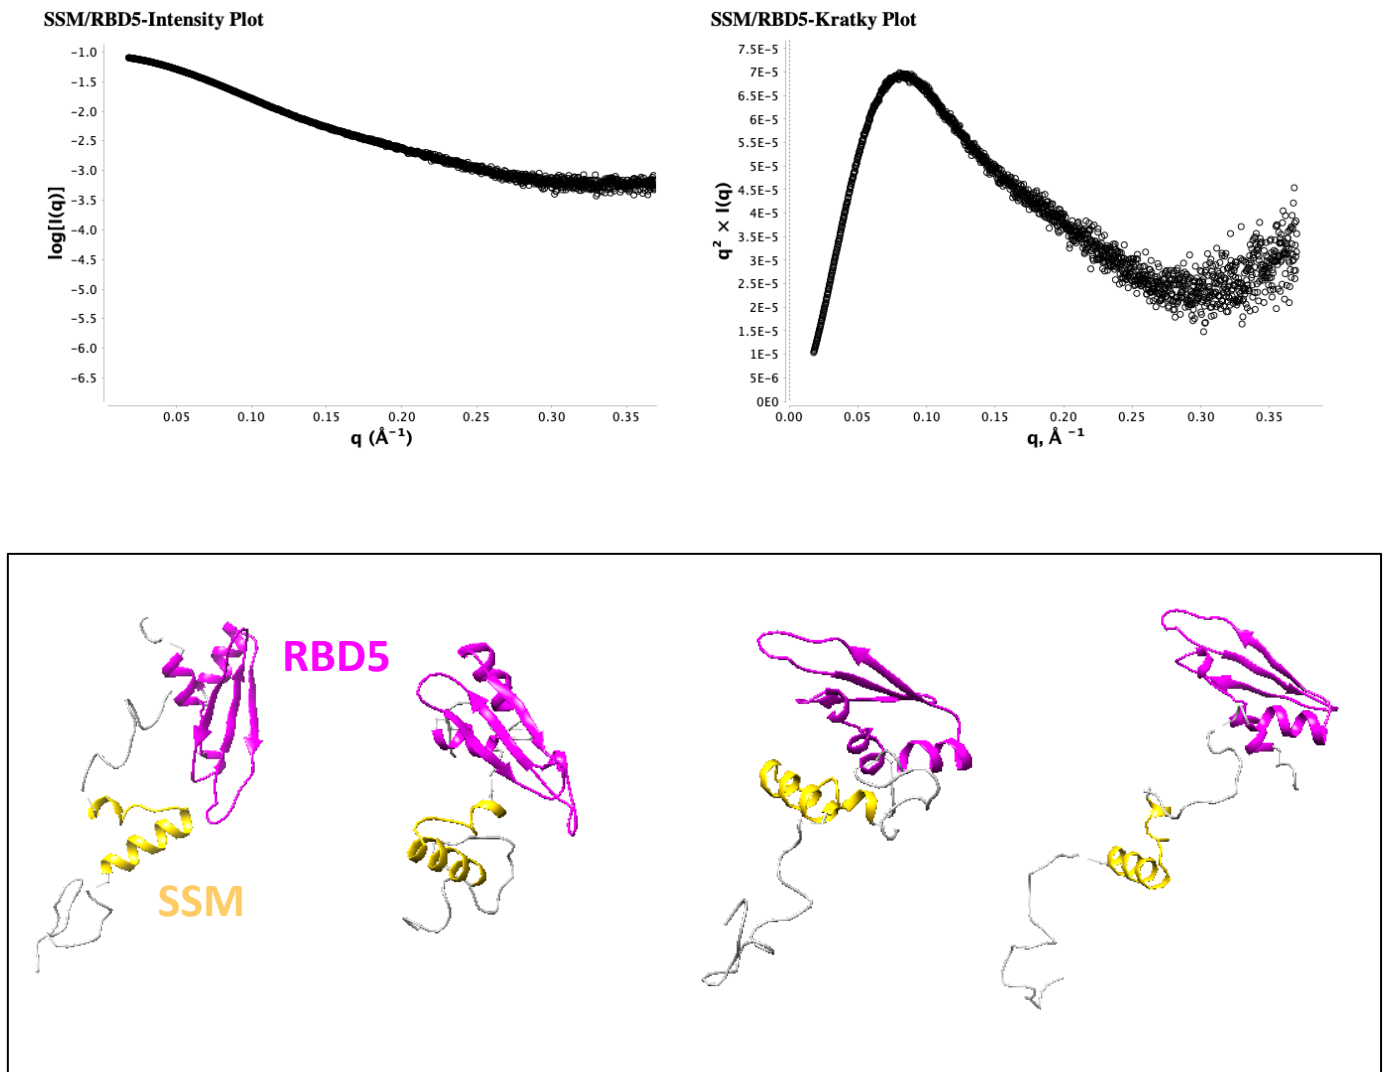

Figure S10. **Small angle X-ray scattering (SAXS) of SSM/RBD5.** A: SAXS curve, Kratky analysis and EOM models generated for SSM/RBD5.  $R_g$  *ensemble* = 25.55  $\text{\AA}$ ,  $D_{\text{max}}$  *ensemble* = 83.44  $\text{\AA}$ ,  $X^2 = 1.405$ ,  $R_{\text{sigma}}$  = ~81.16% (~85.66%).

## Supplementary figure 11

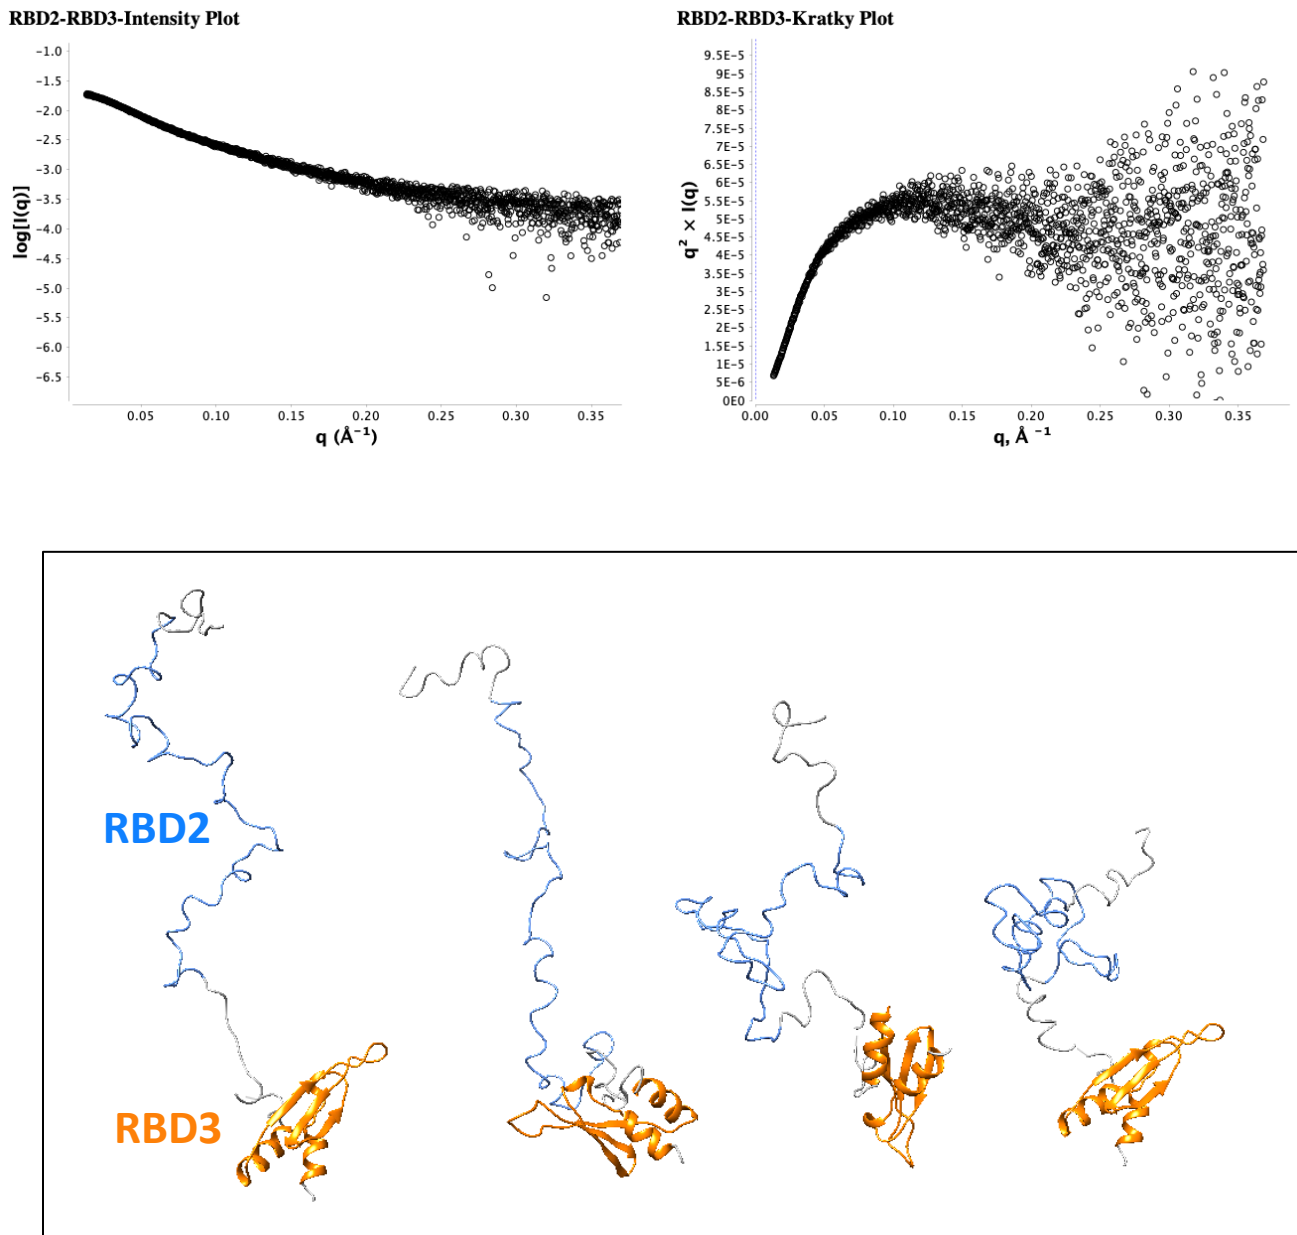

Figure S11. **Small angle X-ray scattering (SAXS) of RBD2-RBD3.** A: SAXS curve, Kratky analysis and EOM models generated for RBD2-RBD3.  $R_g$  ensemble = 37.86  $\text{\AA}$ ,  $D_{\max}$  ensemble = 120.74  $\text{\AA}$ ,  $X^2 = 1.16$ ,  $R_{\sigma} = \sim 85\%$  ( $\sim 85.85\%$ ).

## Supplementary figure 12

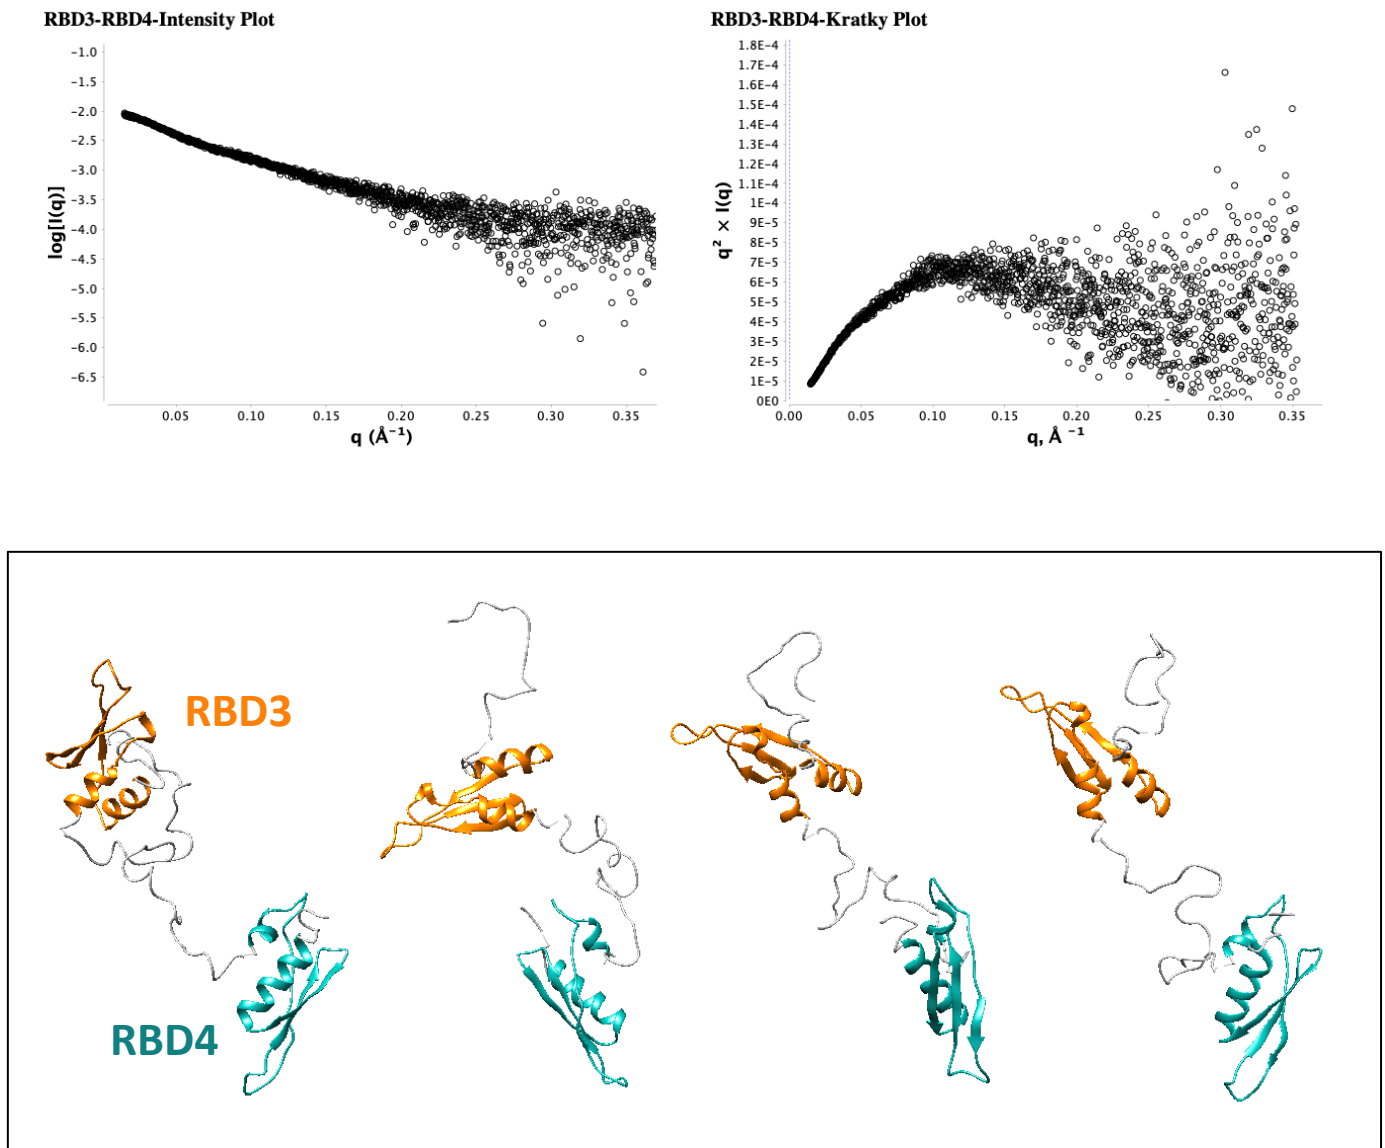

Figure S12. **Small angle X-ray scattering (SAXS) of RBD3-RBD4.** A: SAXS curve, Kratky analysis and EOM models generated for RBD3-RBD4.  $R_g$  ensemble = 36.15  $\text{\AA}$ ,  $D_{\text{max}}$  ensemble = 114.96  $\text{\AA}$ ,  $X^2 = 1.342$ ,  $R_{\text{sigma}} = \sim 80.28\%$  ( $\sim 85.03\%$ ).

## Supplementary figure 13

RBD4-TBD-Intensity Plot

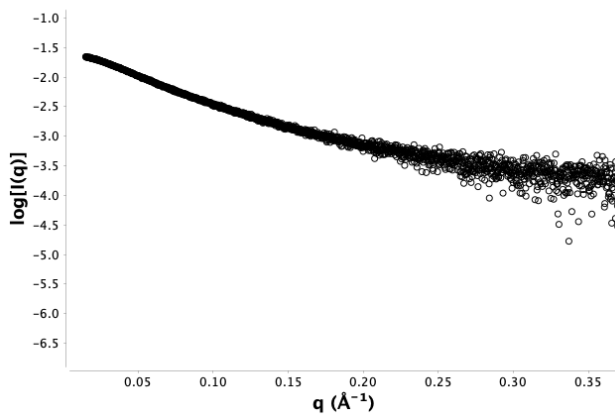

RBD4-TBD-Kratky Plot

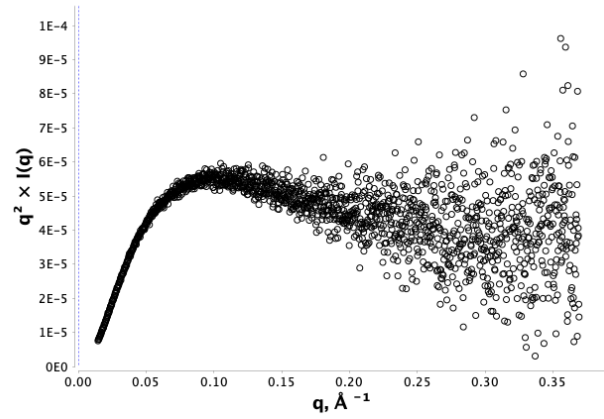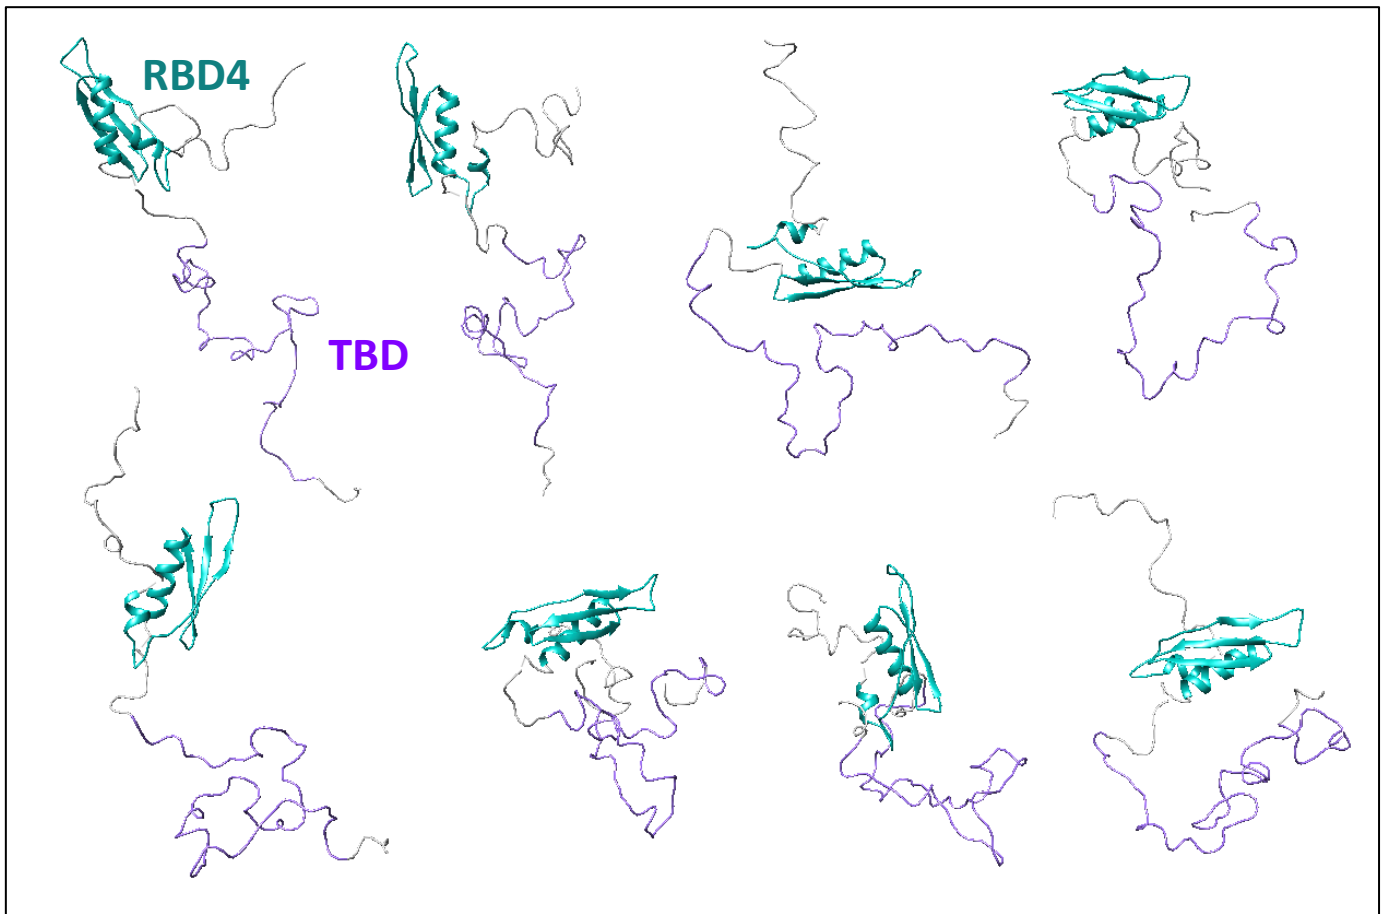

Figure S13. **Small angle X-ray scattering (SAXS)** of TBD-RBD4. A: SAXS curve, Kratky analysis and EOM models generated for TBD-RBD4.  $R_g$  *ensemble* = 36.46  $\text{\AA}$ ,  $D_{\text{max}}$  *ensemble* = 121.16  $\text{\AA}$ ,  $X^2$  = 1.253,  $R_{\text{sigma}}$  =  $\sim 88.79\%$  ( $\sim 86.24\%$ ).

## Supplementary figure 14

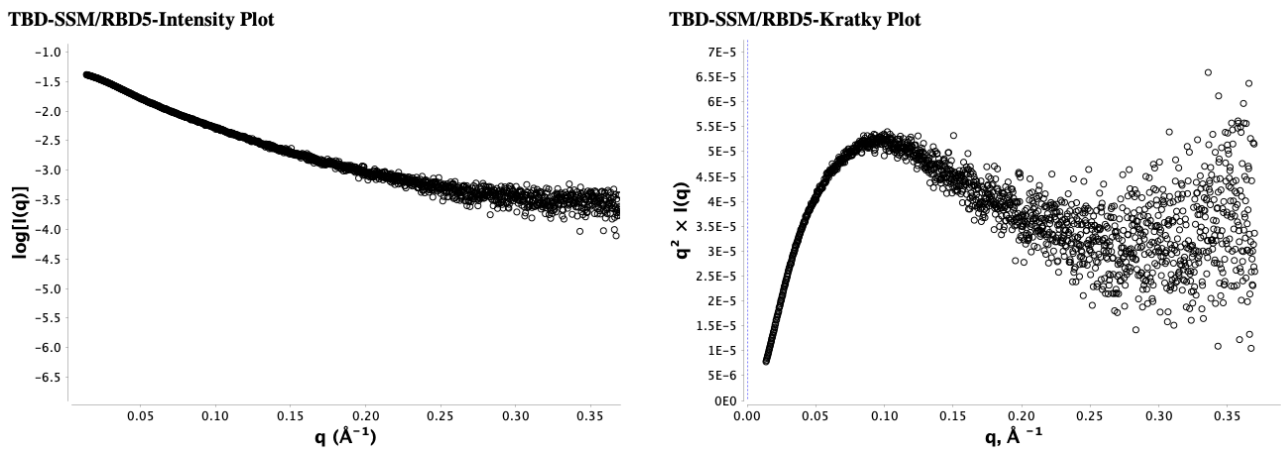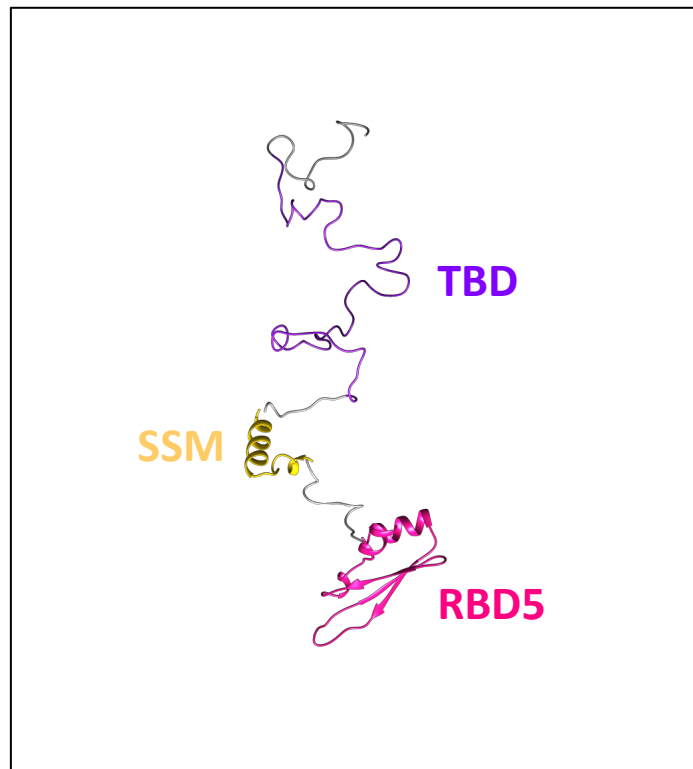

Figure S14. **Small angle X-ray scattering (SAXS) of TBD-SSM/RBD5.** A: SAXS curve, Kratky analysis and BUNCH models generated for TBD-SSM/RBD5.  $R_g$  ensemble = 41.24 Å,  $D_{max}$  ensemble = 129.65 Å,  $X^2 = 1.28$ ,  $R_{sigma} = \sim 89.35\%$  ( $\sim 85.53\%$ ).

## Supplementary table 1

| <b>Construct</b> | <b>Boundaries (aa)</b> | <b>Oligos</b>                                                                                               |
|------------------|------------------------|-------------------------------------------------------------------------------------------------------------|
| RBD2             | 1-85                   | fw: 5'-CCCCGAACATATGATGAAACTTGGAACCAATGTATAA-3'<br>rev: 5'-TGCTTAAAGCTTTCATCATCATGGCAGGGGCTCATTCTGCA-3'     |
| RBD3             | 95-172                 | fw: 5'-CCCCGAACATATGTCCGAAGAAGAAAATCTCAATAAAT-3'<br>rev: 5'-TGCTTAAAGCTTTCATCATCACGGTAACTTCTTCAGCTCCT-3'    |
| RBD4             | 198-275                | fw: 5'-CCCCGAACATATGCCAGAATATGGCCAGGGGAT-3'<br>rev: 5'-TGCTTAAAGCTTTCATCATCAGACTTTGAAACCAAGGATCTCCA-3'      |
| TBD              | 283-366                | fw: 5'-CCCCGAACATATGCCCGCACTCAAGTCAGAGGA-3'<br>rev: 5'-TGCTTAAAGCTTTCATCATCAGGCAGGATTCGGAGCTGCC-3'          |
| SSM/RBD5         | 363-476                | fw: 5'-CCCCGAACATATGCCGAATCCTGCCAAGGCCAC-3'<br>rev: 5'-TGCTTAAAGCTTTCATCATCAGTCCAACCTCAGACAGCAACTTTAAG-3'   |
| RBD2-RBD3        | 1-172                  | fw: 5'-CCCCGAACATATGATGAAACTTGGAACCAATGTATAA-3'<br>rev: 5'-TGCTTAAAGCTTTCATCATCACGGTAACTTCTTCAGCTCCT-3'     |
| RBD3-RBD4        | 95-275                 | fw: 5'-CCCCGAACATATGTCCGAAGAAGAAAATCTCAATAAAT-3'<br>rev: 5'-TGCTTAAAGCTTTCATCATCAGACTTTGAAACCAAGGATCTCCA-3' |
| RBD4-TBD         | 198-366                | fw: 5'-CCCCGAACATATGCCAGAATATGGCCAGGGGAT-3'<br>rev: 5'-TGCTTAAAGCTTTCATCATCAGGCAGGATTCGGAGCTGCC-3'          |
| TBD-SSM/RBD5     | 283-476                | fw: 5'-CCCCGAACATATGCCCGCACTCAAGTCAGAGGA-3'<br>rev: 5'-TGCTTAAAGCTTTCATCATCAGTCCAACCTCAGACAGCAACTTTAAG-3'   |

## Supplementary table 2

| <b>Construct</b>            | <b>Concentration for NMR acquisition (<math>\mu\text{M}</math>)</b> |
|-----------------------------|---------------------------------------------------------------------|
| hStau1 <sup>55</sup> _FL    | 66                                                                  |
| hStau1 <sup>55</sup> _ΔRBD2 | 400                                                                 |
| RBD2                        | 33.3                                                                |
| RBD3                        | 128.44                                                              |
| RBD4                        | 99.1                                                                |
| SSM/RBD5                    | 74.83                                                               |
| RBD2-RBD3                   | 50.69                                                               |
| RBD3-RBD4                   | 22.22                                                               |
| RBD4-TBD                    | 9.57                                                                |
| TBD-SSM/RBD5                | 42.92                                                               |

Table S2. **Protein concentration used for NMR experiments.**
